# Supplementary material for: Identification and validation of genes involved in cervical tumourigenesis
Source: BMC Cancer. 2011 Feb 22;11:80. doi: 10.1186/1471-2407-11-80 (PMC3050856; doi:10.1186/1471-2407-11-80)
Supplement: Additional file 2 — List of genes taken up for validation. [file 1471-2407-11-80-S2.XLS]

## Sheet: Sheet1
GENE LIST
CANCER
AGRN
APOBEC3B
B4GALT1
C20orf42/FERMT1
CDC20
CDC25B
CDH3
CDKN2A
CKS1B
CKS2
COL7A1
DTX3L
IGF2BP2
IL8
INDO
ISG15
ISG20
KRT17
LAMB3
MAFB
MCM4
MCM6
MELK
MMP1
MMP3
NUP210
PARP14
PLOD2
SLC16A1
SLC2A1
SMC4
STAT1
TK1
TOP2A
UBE2C
CIN3
CALML5
CAPNS2
CCNB1
CCNB2
CD36
DBI
DYNLL1
EBP
FLJ44635
HEBP2
HOPX
KRT10
KRTDAP
NUSAP1
PCNA
RGS5
RPL10A
RPL13A
RPL9
RPS3A
RPS8
TIMM8B
TPD52L1
CIN1
CRNN
CSTB
CXCL14
DAPL1
GJA1
SLURP1
SPINK5
NORMAL
C20orf114
FBLN1
FCGBP
TFF3
